# Supplementary material for: A New Function of MbIAA19 Identified to Modulate Malus Plants Dwarfing Growth
Source: MDPI journal article supplement (doi:10.3390/plants12173097), 2023-08-29
Supplement: s1 [file s1]

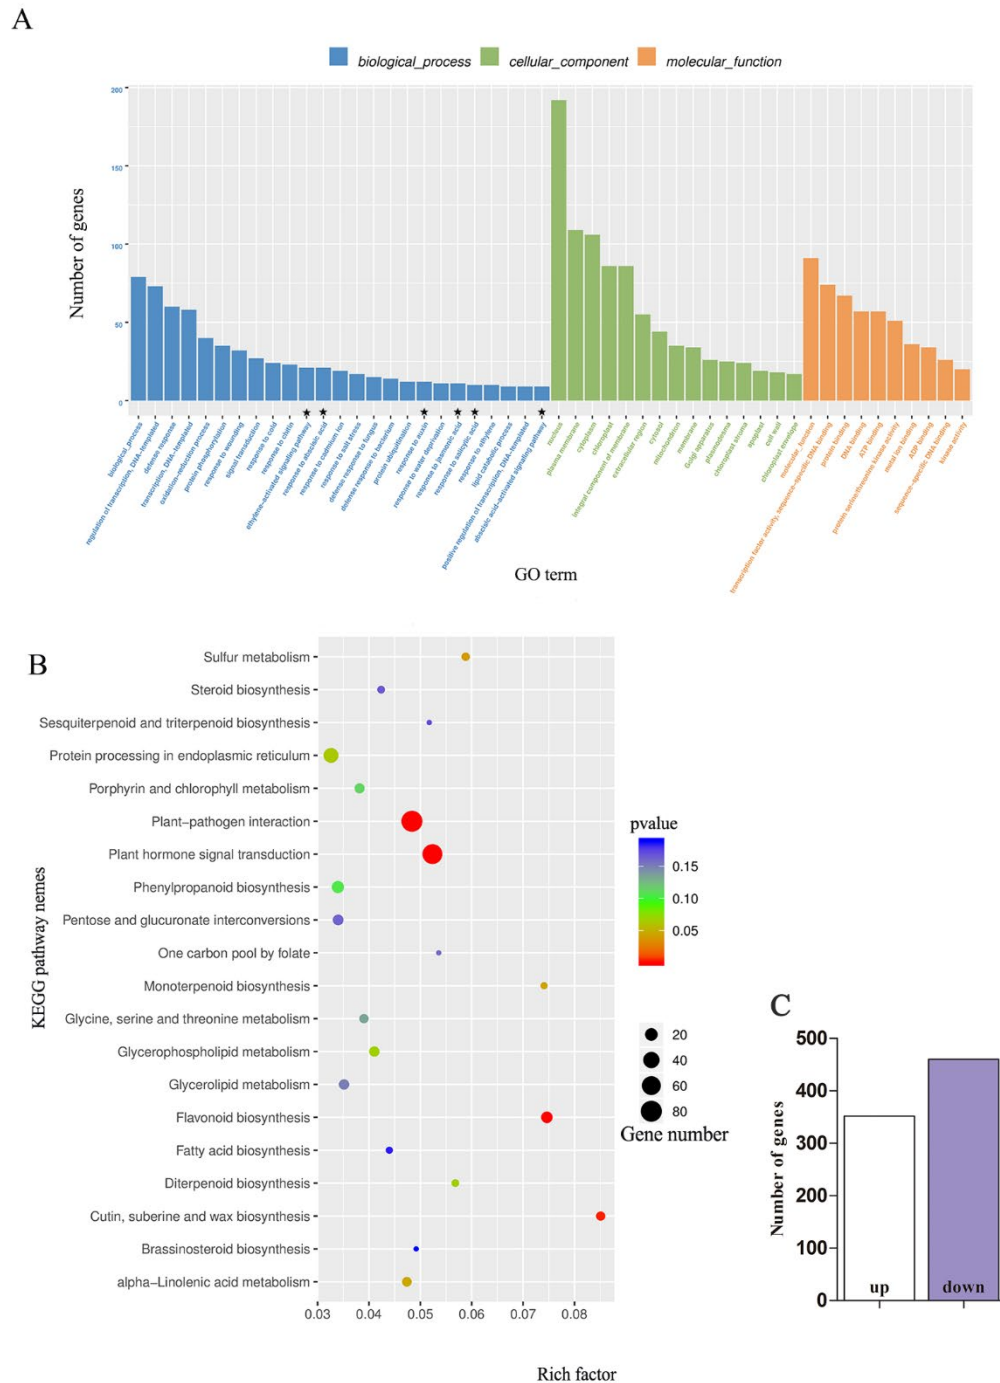

Figure S1. DEGs between the WT and *Dwf* mutant.

(A) GO term enrichment analysis of the DEGs, '★' indicates that the hormones are associated with a biological process. (B) KEGG pathway database enrichment analysis of the DEGs. (C) Number of up-regulated and down-regulated genes between the WT and *Dwf* mutant.

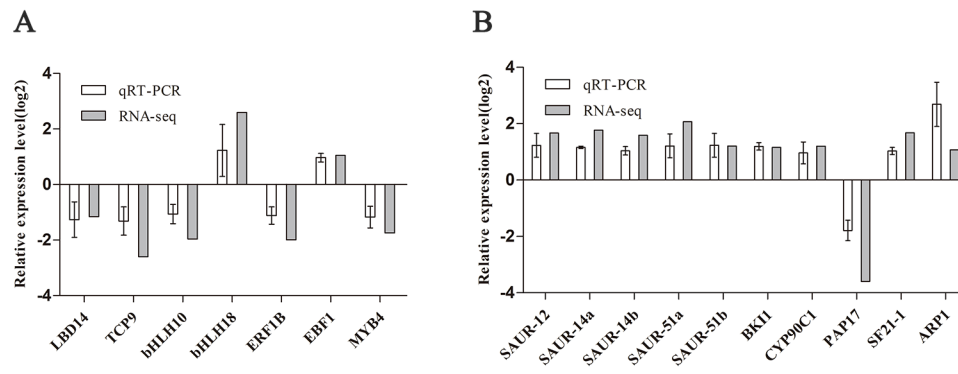

Figure S2. Confirmation of the DEGs by quantitative real time-PCR (qRT-PCR). A total of 17 DEGs obtained from RNA-seq analysis were selected for qRT-PCR validation. (A) Seven transcription factors and growth-related genes. (B) Ten genes related to hormone-signaling pathway. Log<sub>2</sub>FC values of RNA-seq and qRT-PCR are presented.

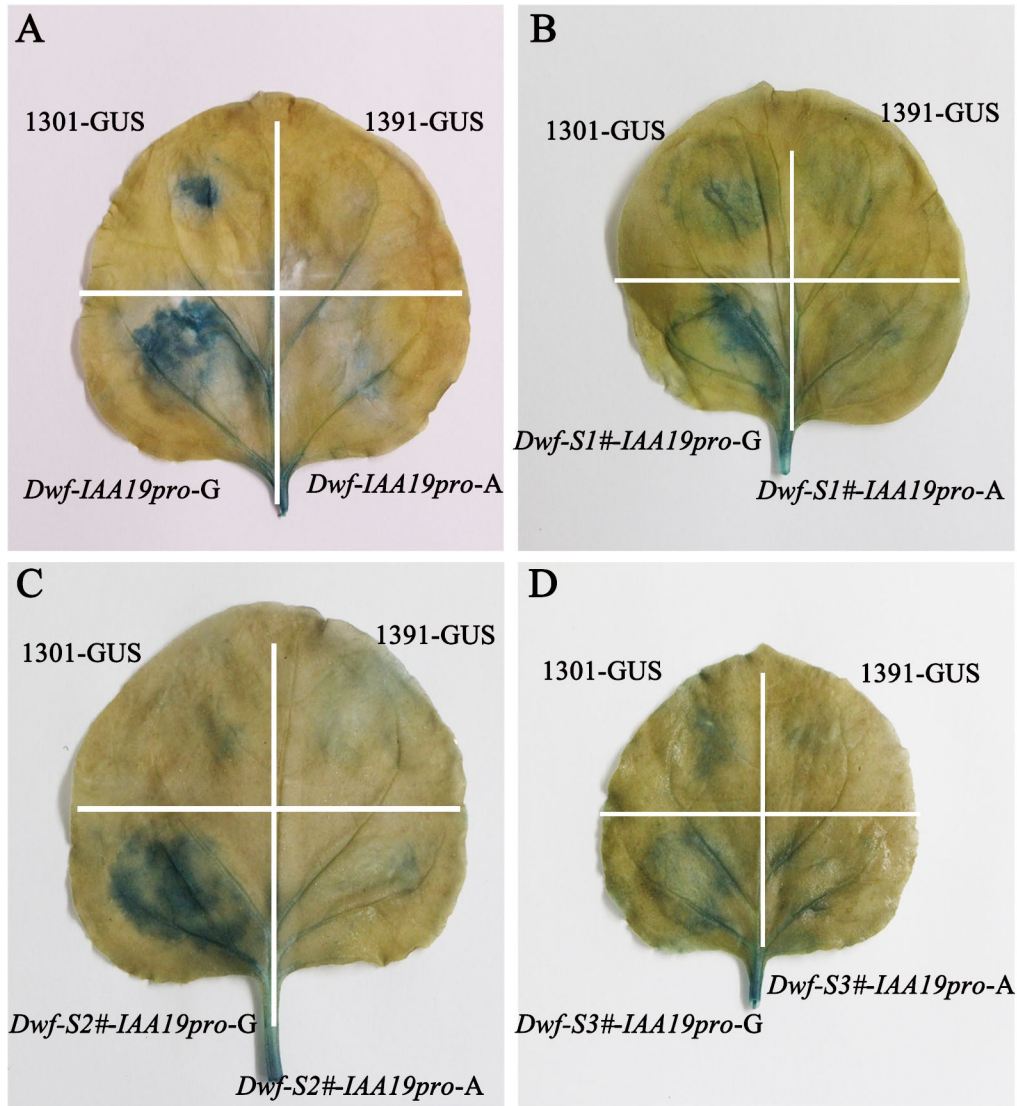

Figure S3. The GUS activity of *MbIAA19* promoter in tobacco leaves.

(A) The staining level of GUS protein in tobacco leaves, initiated by the altered promoters of *MbIAA19* in *Dwf*. (B) The staining level of GUS protein in tobacco leaves, initiated by the altered promoters of *MbIAA19* in *Dwf* seedlings 1# (*Dwf-S1*#). (C) The GUS protein level in tobacco leaves, initiated by the altered promoters of *MbIAA19* in *Dwf* seedlings 2# (*Dwf-S2*#). (D) The GUS protein level in tobacco leaves, initiated by the altered promoters of *MbIAA19* in *Dwf* seedlings 3# (*Dwf-S3*#). The staining level represents the abundance of GUS protein in the leaves.

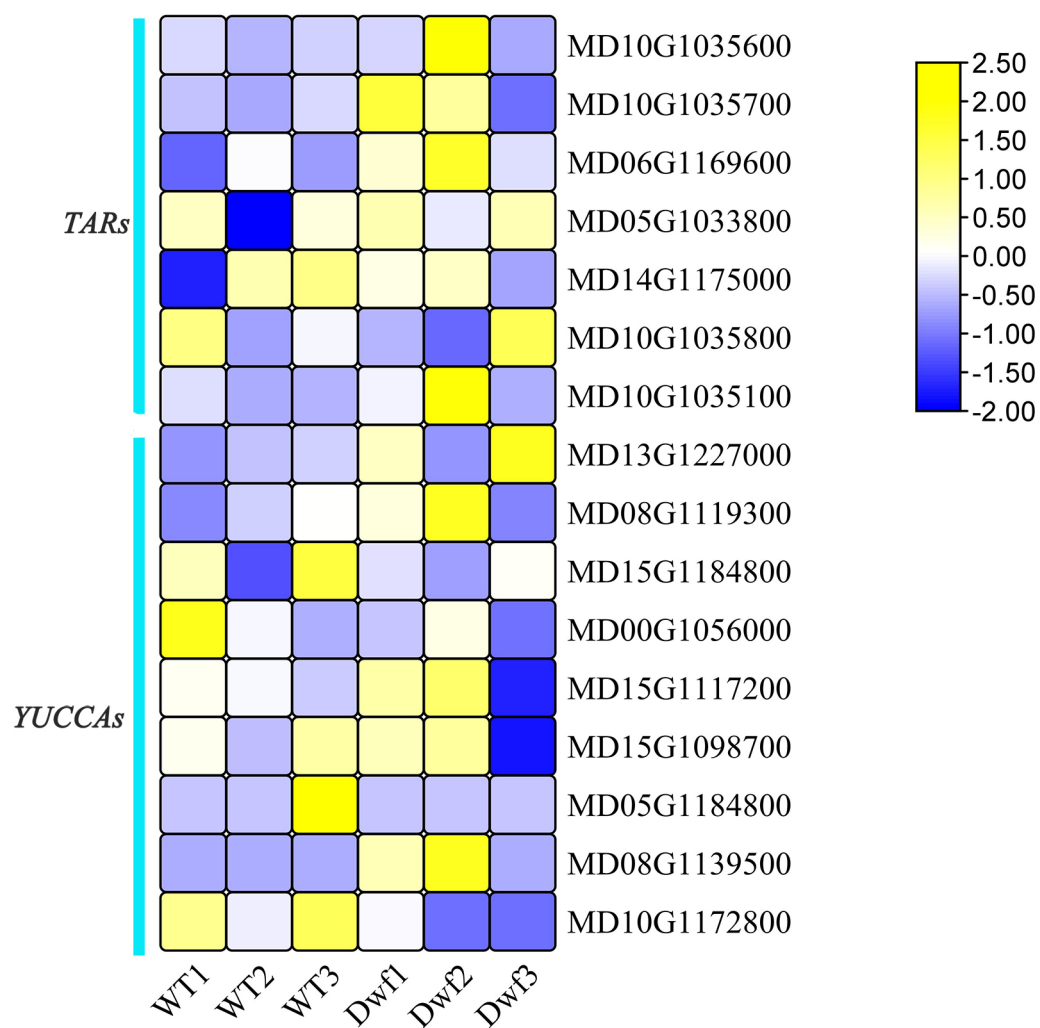

Figure S4. A heat map of seven TAR genes (tryptophan aminotransferase-related gene) and nine YUCCA genes (indole-3-pyruvate monooxygenase gene) in the WT and *Dwf* identified using RNA-seq.

Table S1. Primers used in this study

| Purpose                   | Primer name     | Sequence (5' to 3')                                   |
|---------------------------|-----------------|-------------------------------------------------------|
| Primers for gene cloning  | IAA19-CDS-F     | ATGGCCAAAGAAGGTTTAGGG                                 |
|                           | IAA19-CDS-R     | TTATGGCTCCTCTTCCATTGTT                                |
| RNAi-IAA19                | IAA19-forward-F | gagaacacgggggactctagaGCCAAAGAAGGTTTAGGGCTTG           |
|                           | IAA19-forward-R | tggATTCTTCAACACCTCGCCGA                               |
|                           | Intron-F        | gcgaggtgtgaagaatCCAATTGGTAAGGAAATAATTATTTTCT          |
|                           | Intron-R        | cggcgaggtgtgaagaatATCGATTTCGAACCCAGCTTC               |
|                           | IAA19-anti-F    | tATTCTTCAACACCTCGCCGA                                 |
|                           | IAA19-anti-R    | cgatcggggaaattcgagctcGCCAAAGAAGGTTTAGGGCTTG           |
| Subcellular localization  | IAA19GFP-F      | agctcgggtaccgggggatccATGGCCAAAGAAGGTTTAGGG            |
|                           | IAA19GFP-R      | ccttgctcaccatggtgtcgacTGGCTCCTCTTCCATTGTT             |
| GUS activity assays       | 1391-proIAA19-F | tggtgcaggtcgacggatccGTTTAAGTTTTTTTGCTGTTAATTTAAA<br>A |
|                           | 1391-proIAA19-R | tcttagaattcccggggatccTTGGGTTTTGAGGGTTTTGAGA           |
| Relative expression level | IAA19 -F        | CAGATCTTGCTCTGGCGTTG                                  |
|                           | IAA19 -R        | TTGTGCTGCAGTCCAAATCC                                  |
|                           | 18S-F           | TGACCGAATGAGCAAGGAAATTACT                             |
|                           | 18S-R           | TACTCAGCTTTGGCAATCCACATC                              |
|                           | SAUR-12-F       | ATGCTCGAGCTTGGGAAAGA                                  |
|                           | SAUR-12-R       | CAAATTCCTCTTCGGCTTGG                                  |
|                           | ARP1-F          | AGAGTTGGGCTGTGGCTTGT                                  |
|                           | ARP1-R          | TTCCGCTCGTGCTAAAGACA                                  |
|                           | LBD14-F         | GCTCTCCGATTTCCTTGCTGT                                 |
|                           | LBD14-R         | CCAACAAAGTAGGCTCCGGT                                  |
|                           | SF21-1-F        | TAATGACAGCAACCGATCCA                                  |
|                           | SF21-1-R        | CCCATGTTTGGCAGAGTTTT                                  |
|                           | PAP17-F         | CCCCACCAAACAAGATGGAT                                  |
|                           | PAP17-R         | GTCATGCTCGCTGGTGAGTC                                  |
|                           | ERF1B-F         | GGGCACCCAAGAAATCACAT                                  |
|                           | ERF1B-R         | GCCTAGCCACACCTTATGC                                   |
|                           | bHLH18-F        | AAGGCCAGTCAGGGAACAAA                                  |
|                           | bHLH18-R        | TCACAAACACGACCGATTCC                                  |
|                           | bHLH10-F        | CCGAGGTTGATATCCGCATT                                  |
|                           | bHLH10-R        | ACTGCCGGTAGGTGGAAGT                                   |
|                           | MYB4-F          | GCAAGAGCTAGACCCCGTTG                                  |
|                           | MYB4-R          | CATCAGAATCCCGGCTGAT                                   |
|                           | TCP9-F          | ATAGCCACAGGCACCATTC                                   |
|                           | TCP9-R          | CGACGCAACTCCACTACGAC                                  |
|                           | EBF1-F          | GTGCCCCGTTGGTATCTGACA                                 |
|                           | EBF1-R          | TCCCGATCACTGTGGTTGAC                                  |
|                           | CYP90C1-F       | GGCTACACCTCTCGACCTGTCAG                               |
|                           | CYP90C1-R       | CCACCTTGTTACCTCAGCATCC                                |

|            |                          |
|------------|--------------------------|
| SAUR-51b-F | AGCAGCAACACTACGACGAACAG  |
| SAUR-51b-R | CGGGTCAGGAAGGAGATCGGTAC  |
| SAUR-51a-F | CAGTTCCAATGCCTCCGCCAAG   |
| SAUR-51a-R | GACTTCTTCGCAAGGGATGGTGAG |
| SAUR-14b-F | GTGAGAAGCAGCGGTTTGTTGTTT |
| SAUR-14b-R | CGCCCATTTGGGTGATCATATCCG |
| SAUR-14a-F | AGAAGCAGCGGTTGTTGTTCC    |
| SAUR-14a-R | TTCCTCCTCAGCGTCACTCAGC   |
| BKI1-F     | CTCCGACGAATAGTGGGCATCTTG |
| BKI1-R     | GGGCTTCTCTTCTGTGGCAATGG  |

---
